# Supplementary material for: Oxygen binding energy of doped metal: a shortcut to efficient Ni-based bimetallic catalysts for the hydrodeoxygenation reaction
Source: Royal Society of Chemistry journal article supplement (doi:10.1039/d1cy00496d), 2021-01-01
Supplement: d1cy00496d1.pdf [file d1cy00496d1.pdf]

## Electronic Supporting Information

### Oxygen Binding Energy of Doped Metal: A Shortcut to Efficient Ni- Based Bimetallic Catalysts for Hydrodeoxygenation Reaction

Lifang Chen, Wei Liu, Haisong Feng, Yingyu Ren, Chunyuan Chen, Si Wang, Pan Yin, Yusen  
Yang,\* Xin Zhang,\* Min Wei

*State Key Laboratory of Chemical Resource Engineering, Beijing Advanced Innovation Center for Soft  
Matter Science and Engineering, Beijing University of Chemical Technology, Beijing 100029, P. R.  
China*

\* Corresponding authors. Tel: +86-10-64412131; Fax: +86-10-64425385.

E-mail addresses: [yangyusen@mail.buct.edu.cn](mailto:yangyusen@mail.buct.edu.cn) (Y. Yang); [zhangxin@mail.buct.edu.cn](mailto:zhangxin@mail.buct.edu.cn) (X. Zhang).

**Table S1.** Lattice parameters (in Å) of bulk Ni as calculated with PBE and DFT-D3 functionals and comparison to experiment

| Method              | Lattice constant |
|---------------------|------------------|
| PBE                 | 3.517            |
| Expt <sup>1</sup> . | 3.524            |

**Table S2.** The optimized cell parameters of the bulk Ni-M (from Sc to Mo)

| Doped Metal | a/Å    | b=c/Å  | Element | a=c/Å  | b/Å    |
|-------------|--------|--------|---------|--------|--------|
| Sc          | 3.184↓ | 4.371↓ | Y       | 3.443↓ | 4.588↑ |
| Ti          | 3.474↓ | 3.849↑ | Zr      | 3.145↓ | 4.529↑ |
| V           | 3.708↑ | 3.511↓ | Nb      | 3.787↑ | 3.808↑ |
| Cr          | 3.722↑ | 3.394↓ | Mo      | 3.843↑ | 3.646↑ |
| Mn          | 3.581↑ | 3.462↓ | Ru      | 3.650↑ | 3.648↑ |
| Fe          | 3.563↑ | 3.497↓ | Rh      | 3.704↑ | 3.562↑ |
| Co          | 3.567↑ | 3.443↓ | Pd      | 3.773↑ | 3.607↑ |
| Cu          | 3.516↓ | 3.511↓ | Ag      | 3.814↑ | 3.796↑ |
| Zn          | 3.328↓ | 3.727↑ |         |        |        |

**Table S3.** The mixing energies of bimetal models

| Doped Metal | Mixing Energy/eV* | Doped Metal | Mixing Energy/eV |
|-------------|-------------------|-------------|------------------|
| Sc          | -1.98             | Y           | -1.21            |
| Ti          | -1.43             | Zr          | -1.43            |
| V           | -0.72             | Nb          | -1.08            |
| Cr          | -0.19             | Mo          | -0.37            |
| Mn          | --                | Ru          | 0.76             |
| Fe          | -0.23             | Rh          | -0.13            |
| Co          | -0.03             | Pd          | -0.20            |
| Cu          | 0.17              | Ag          | 0.69             |
| Zn          | -1.04             |             |                  |

\*  $E_{mixing} = E_{total} - mE_{Ni_{bulk}} - nE_{M_{bulk}}$  m, n is the number of Ni atom and doped metal atom in bimetal bulk.

**Table S4.** The magnetic moment of Mn in NiMn and the corresponding to the energy, respectively

| MAGMOM (Mn)             | 3        | 5        | 7        | Spin polarization |
|-------------------------|----------|----------|----------|-------------------|
| Energy(eV) of NiMn(111) | -461.578 | -461.581 | -461.582 | -461.667          |

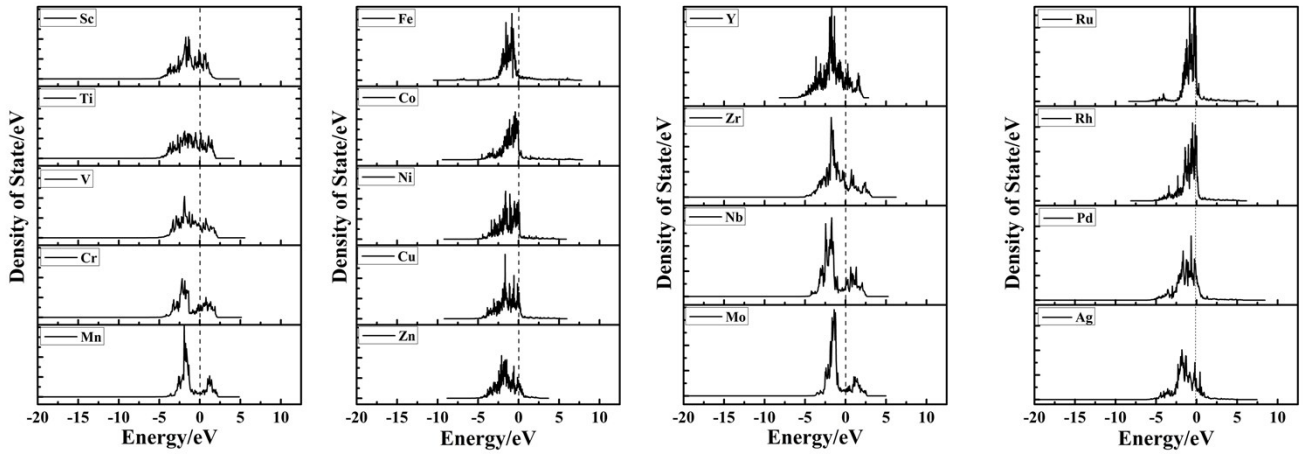

**Figure S1.** The projected density of state of Ni on Ni-M (111) surface. Dash line respects Fermi energy.

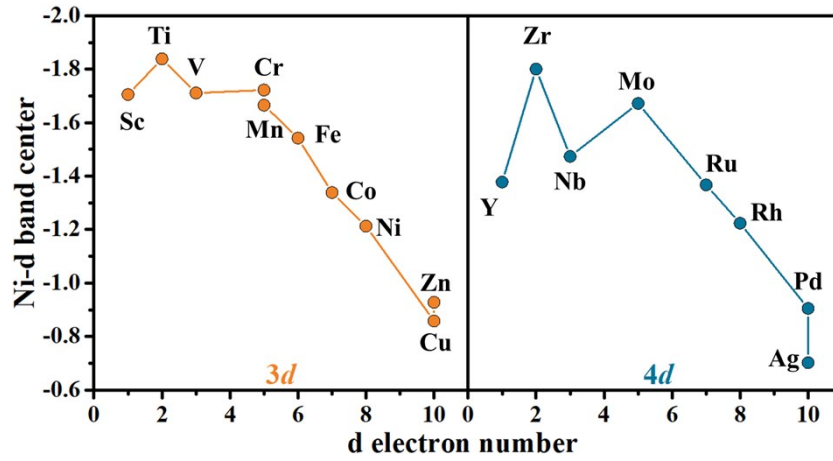

**Figure S2.** The  $d$  band center<sup>a</sup> shift of parent metal Ni after addition of M in Ni-M (111).

<sup>a</sup> The  $d$  band center<sup>2</sup> is calculated by

$$\varepsilon_d = \frac{\int_{-\infty}^{\infty} n_d(\varepsilon)\varepsilon d\varepsilon}{\int_{-\infty}^{\infty} n_d(\varepsilon)d\varepsilon}$$

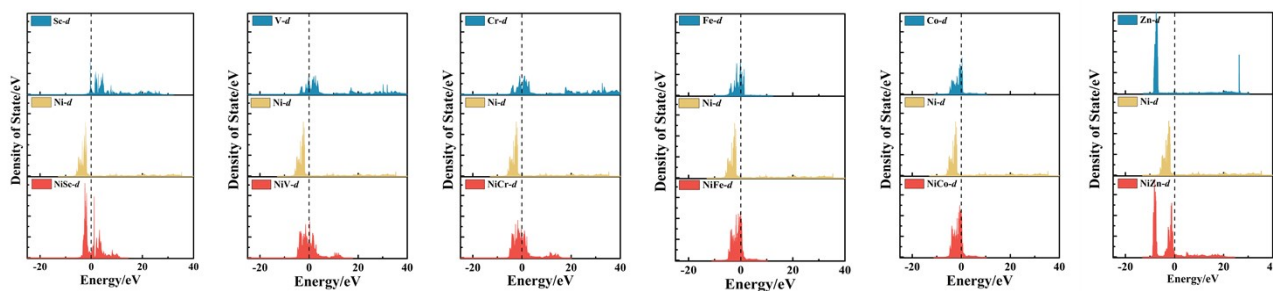

**Figure S3.** The 3d band projected density of state of NiSc(V, Cr, Fe, Co, Zn) bimetal bulk. The red: NiSc (V, Cr, Fe, Co, Zn)-3d band; the yellow: pure Ni-3d band; the blue: pure Sc(V, Cr, Fe, Co, Zn)-3d band. The bash line is Femi energy.

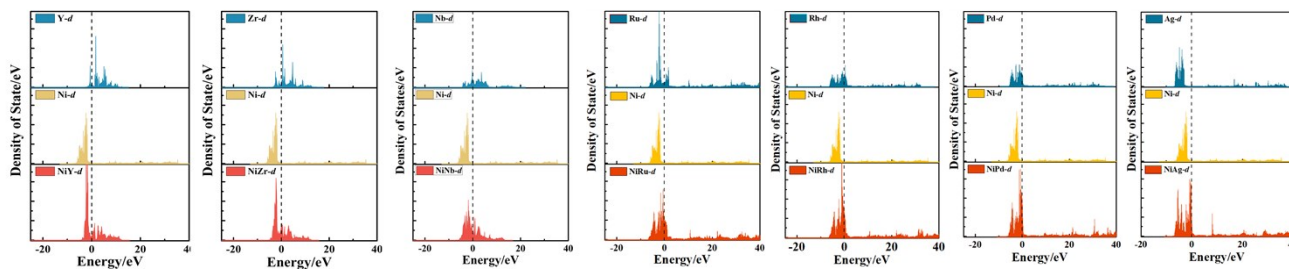

**Figure S4.** The 4d band projected density of state of NiY(Zr, Nb, Ru, Rh, Pd, Ag) bimetal bulk. The red: NiY(Zr, Nb, Ru, Rh, Pd, Ag)- 4d band; the yellow: pure Ni-3d band; the blue: pure NiY(Zr, Nb, Ru, Rh, Pd, Ag)- 4d band. The bash line is Femi energy.

| Site         | Ni-Fe                                                                             | Ni-Ni                                                                             | Fe-Fe                                                                              | Fe-Ni                                                                               |
|--------------|-----------------------------------------------------------------------------------|-----------------------------------------------------------------------------------|------------------------------------------------------------------------------------|-------------------------------------------------------------------------------------|
| Top view     | 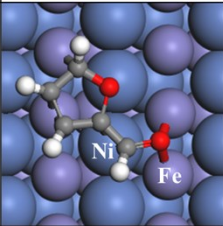 |  |  |  |
| $E_{ads}/eV$ | -1.91                                                                             | -1.83                                                                             | -1.86                                                                              | -1.61                                                                               |
| Site         | Ni-Sc                                                                             | Ni-Ni                                                                             | Sc-Sc                                                                              | Sc-Ni                                                                               |
| Top view     |  | /                                                                                 |  |  |
| $E_{ads}/eV$ | -2.89                                                                             | /                                                                                 | -2.66                                                                              | -2.46                                                                               |

**Figure S5.** Structures and adsorption energies of furfural absorbed on various adsorption sites based on NiFe(111) and NiSc(111) surface.

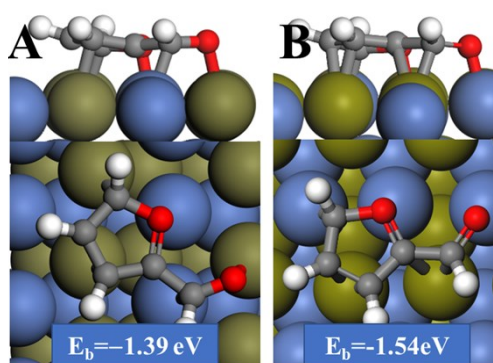

**Figure S6.** Structures and adsorption energies of furfural absorbed on Ni-Pd site and Pd-Ni site. A doped metal is noble metal, the most stable adsorption structure is the bind of C-Pd and O-Ni(B).

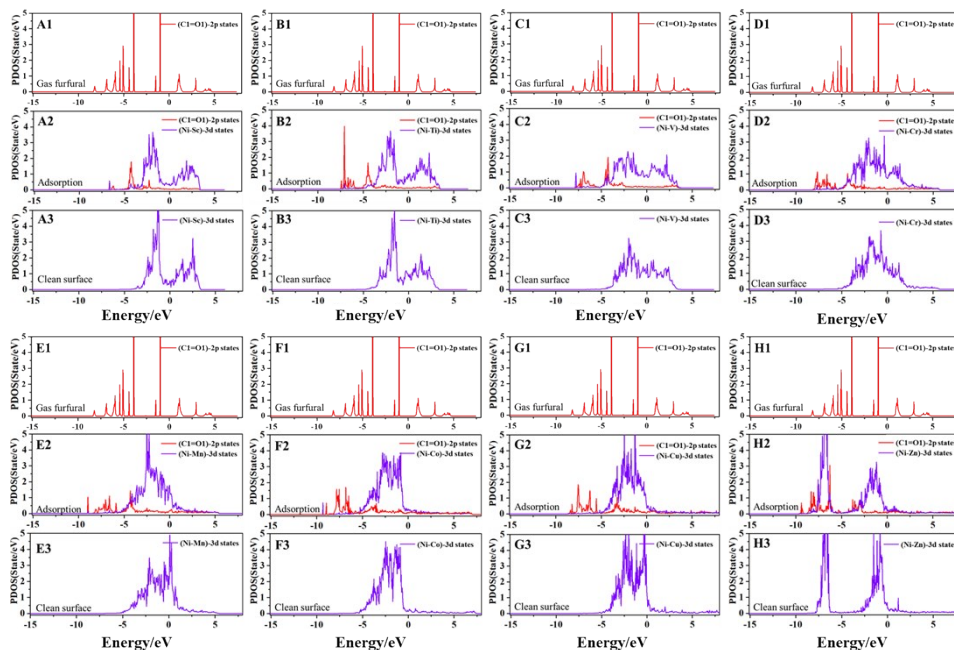

**Figure S7.** Projected density of states (PDOS) for C1=O1 in gas FAL (A1), in adsorbed FAL on Ni-M (A2-Sc, B2-Ti, C2-V, D2-Cr, E2-Mn, F2-Co, G2-Cu and H2-Zn), and the PDOS of Ni-M in clean surface (A3-H3).

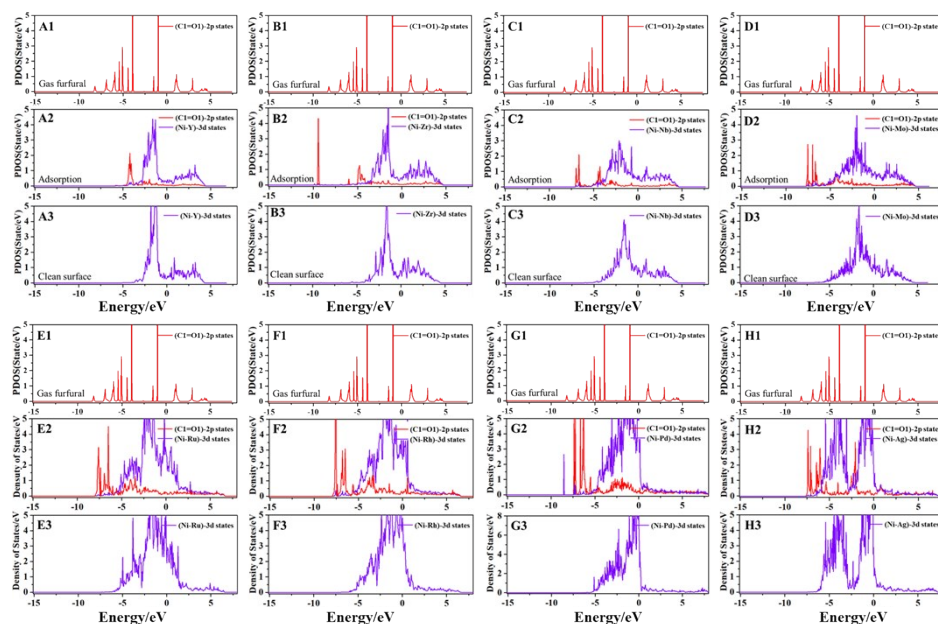

**Figure S8.** Projected density of states (PDOS) for C1=O1 in gas FAL (A1), in adsorbed FAL on Ni-M (A2-Y, B2-Zr, C2-Nb, D2-Mo, E2-Ru, F2-Rh, G2-Pd, and H2-Ag), and the PDOS of Ni-M in clean surface (A3-H3).



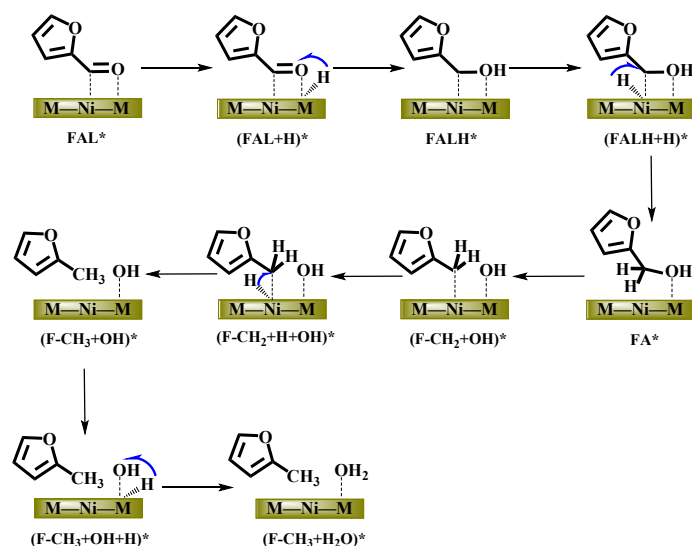

**Figure S9.** The elementary steps and reaction process for FAL conversion to 2-MF involves three main chemical process, hydrogenation, C-OH scission, and finally hydrogenation to product.

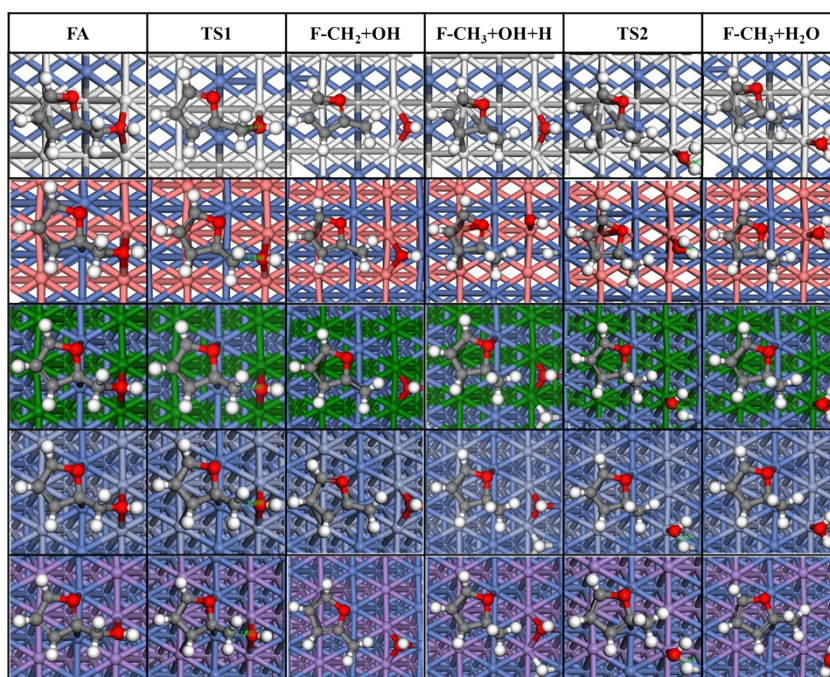

**Figure S10.** The structures of reactants, TS, and products for the conversion of FAL to 2-MF on Ni-M (M = Sr, Ti, V, Cr, Mn).



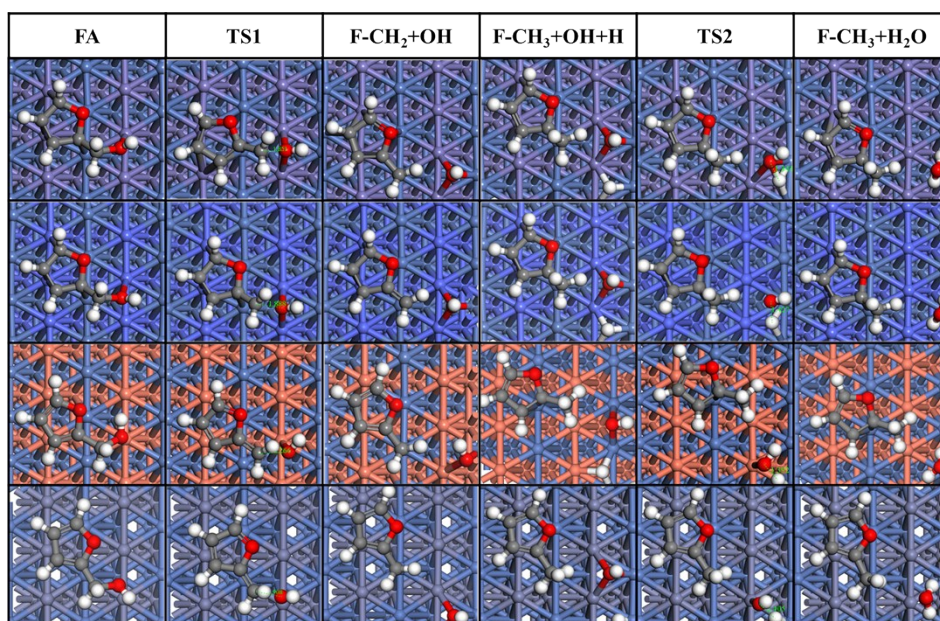

**Figure S11.** The structures of reactants, TS, and products for the conversion of FAL to 2-MF on Ni-M (M = Fe, Co, Cu, Zn).

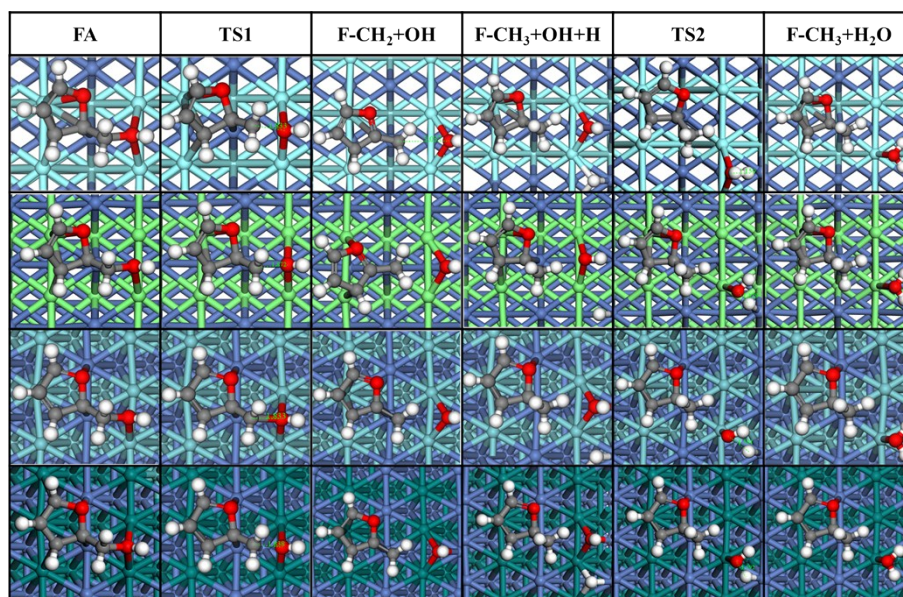

**Figure S12.** The structures of reactants, TS, and products for the conversion of FAL to 2-MF on Ni-M (M = Y, Zr, Nb, Mo).

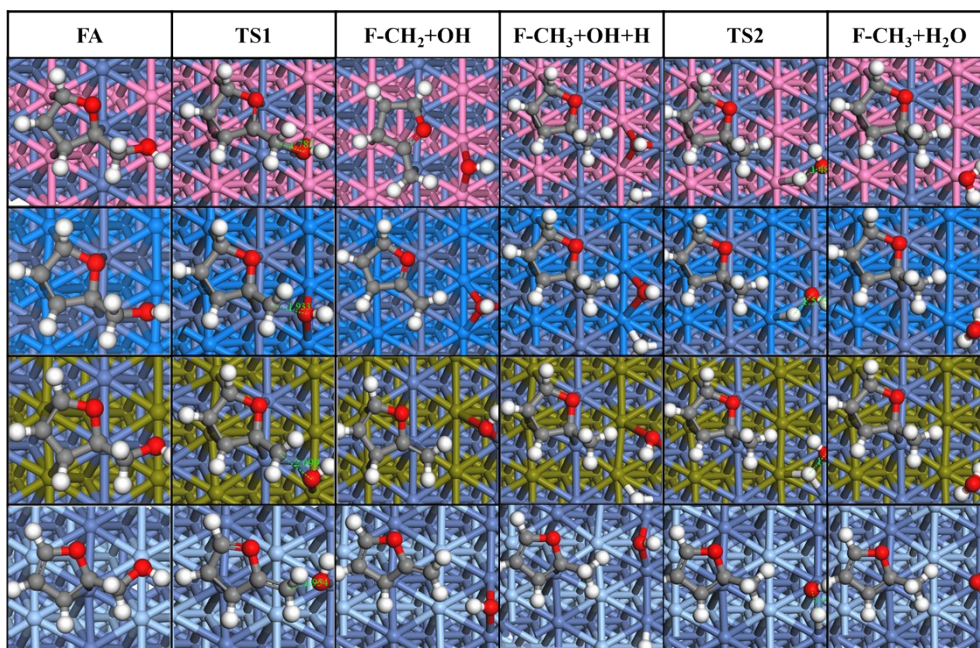

**Figure S13.** The structures of reactants, TS, and products for the conversion of FAL to 2-MF on Ni-M (M = Ru, Rh, Pd, Ag).

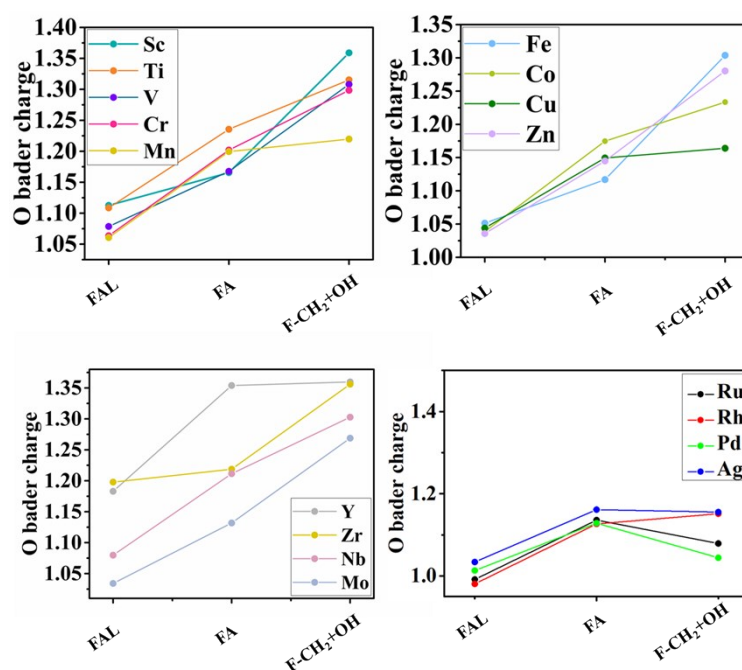

**Figure S14.** The change of O Bader charge in whole reaction process.



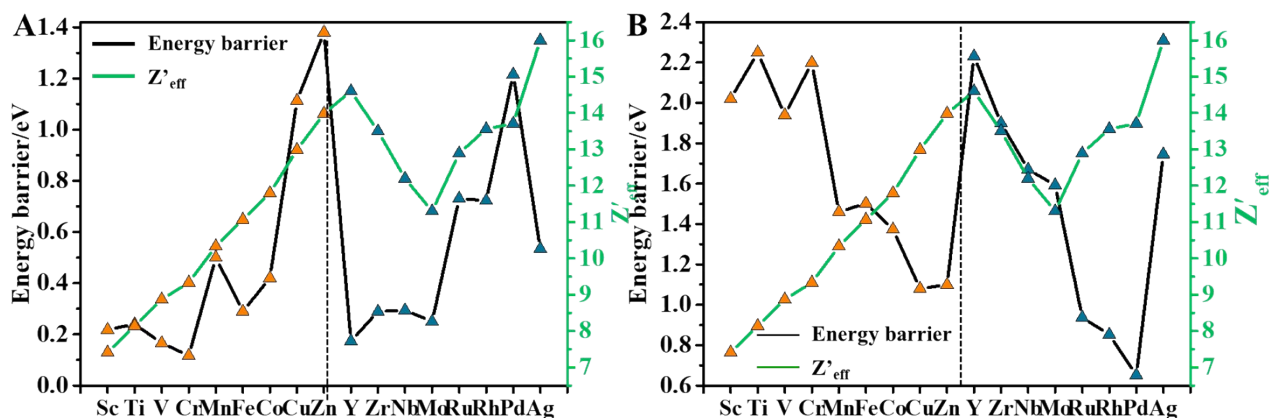

**Figure S15.** Relationship between element order and energy barrier (left side)/the effective nuclear charge ( $Z'_{\text{eff}}$ ) (right side),  $Z'_{\text{eff}}$  from the compilation by Clementi et al<sup>3,4</sup>. (A) for C-OH scission, (B) for \*OH species hydrogenation. Orange represents Ni-M (M=3d elements); blue represents Ni-M (M=4d elements).

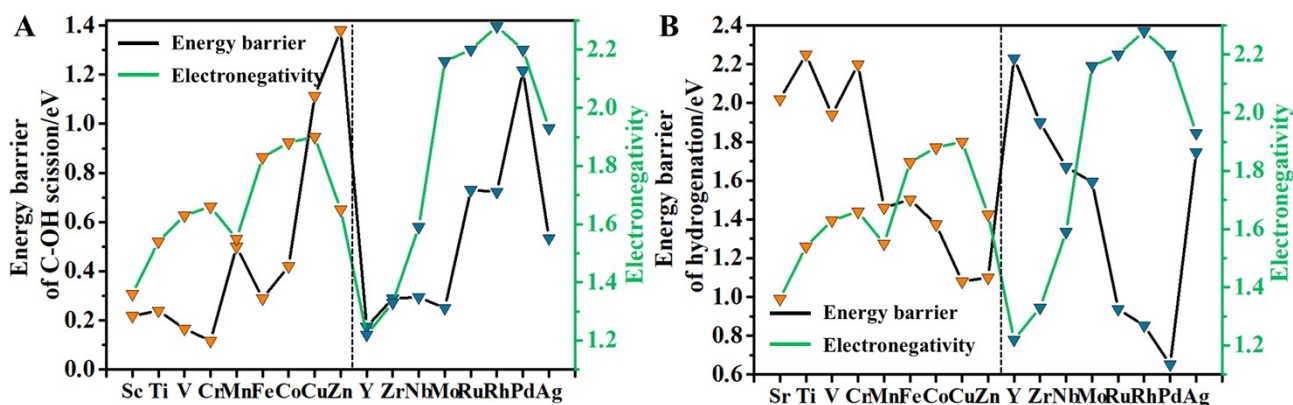

**Figure S16.** Relationship between element order and energy barrier (left side)/electronegativity (right side). (A) for C-OH scission, (B) for \*OH species hydrogenation. Orange represents Ni-M (M=3d elements); blue represents Ni-M (M=4d elements).

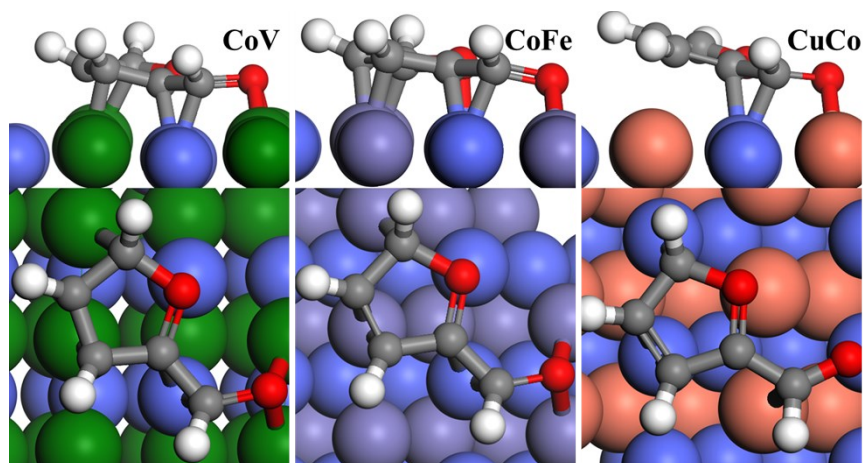

**Figure S17.** Adsorption structures of FAL on the surface of CoV, CoFe, and CuCo bimetallic catalysts.

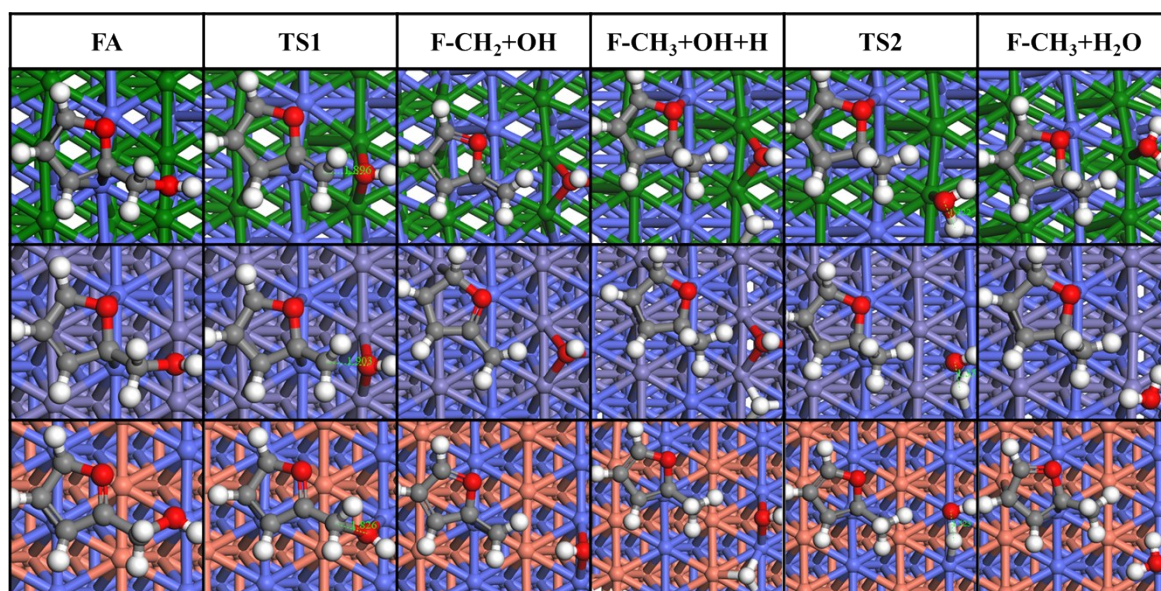

**Figure S18.** The structures of reactants, TS, and products for the conversion of FAL to 2-MF on CoV, CoFe, and CoCu bimetallic catalysts.

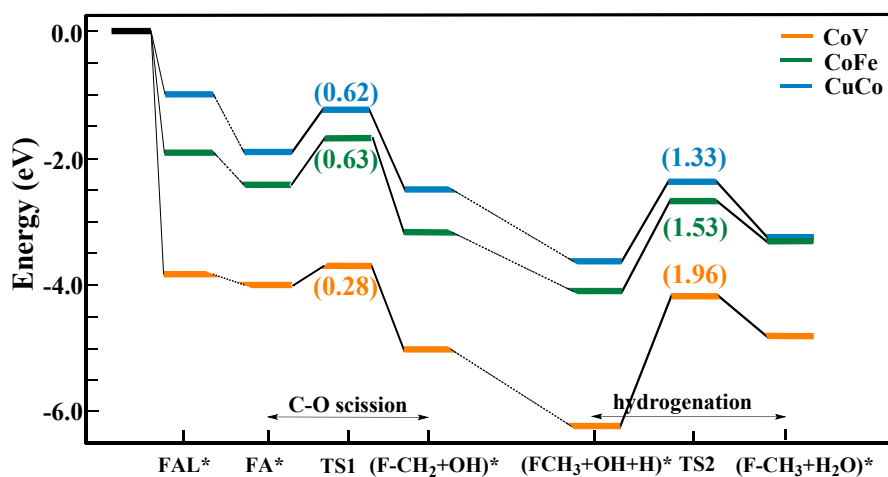

**Figure S19.** Potential energy profiles (in eV) for FAL conversion to 2-MF on CoV(111), CoFe(111), and CuCo(111) surfaces.

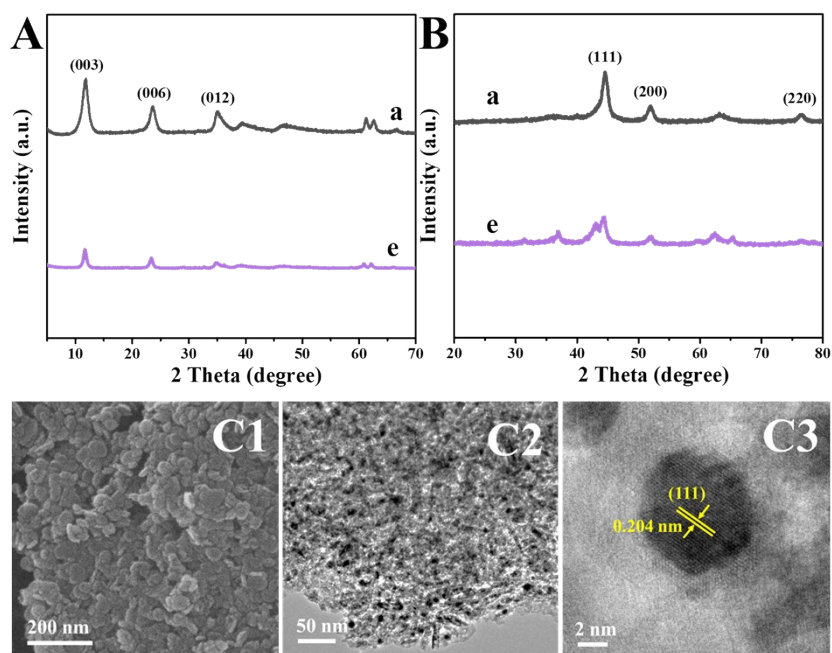

**Figure S20.** (A). XRD patterns of the as-synthesized LDHs precursors: (a)  $\text{Ni}_{0.5}\text{Mg}_{1.5}\text{Al}_1$ -LDHs, (e)  $\text{Ni}_{0.5}\text{Mn}_{0.5}\text{Mg}_{1.5}\text{Al}_{0.5}$ -LDHs. (B) XRD patterns of the resulting Ni and Ni-based alloys: (a) Ni/MgAl-MMO, (e) NiMn/MgAl-MMO. SEM, TEM and HRTEM images of the resulting Ni and Ni-based alloys: (C1-C3) NiMn/MgAl-MMO.

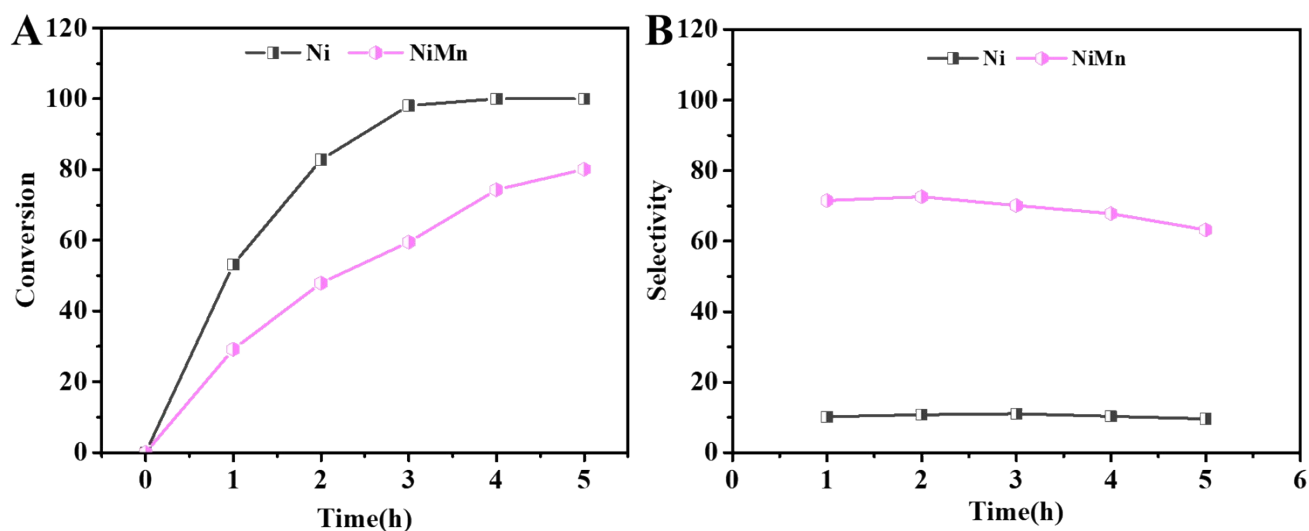

**Figure S21.** (A) Catalytic conversion and (B) corresponding selectivity vs. reaction time for FA hydrogenation over monometallic Ni and NiMn alloys.

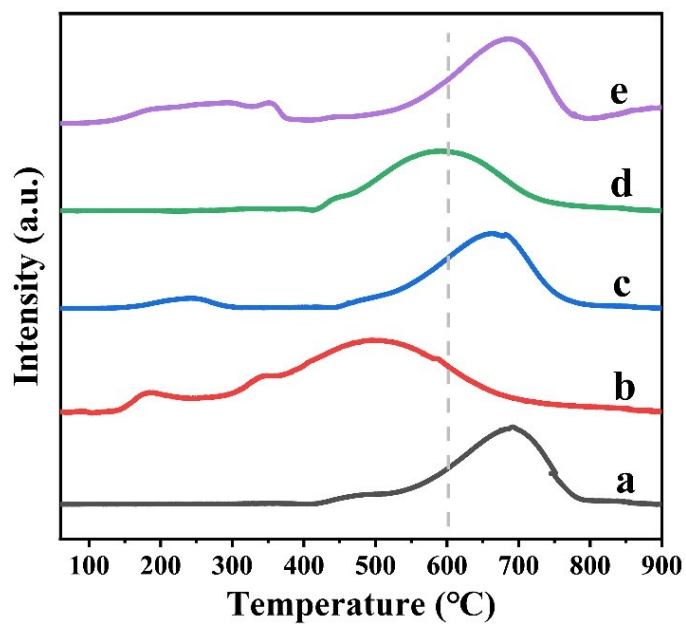

**Figure S22.** H<sub>2</sub>-TPR profiles of (a) Ni, (b) NiCu, (c) NiCo, (d) NiZr and (e) NiMn., respectively.



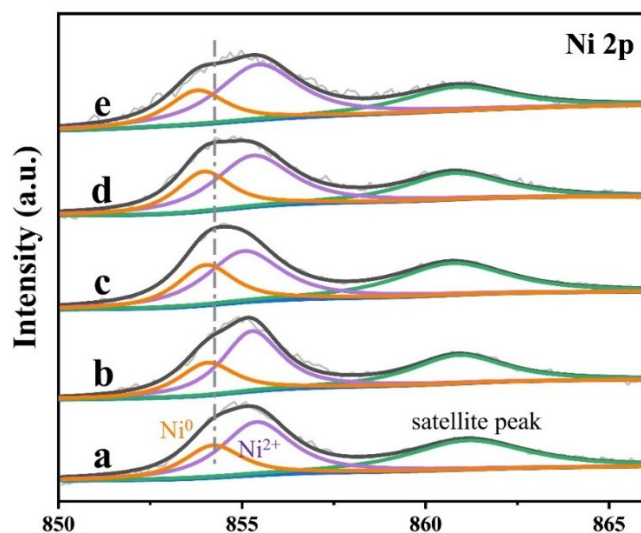

**Figure S23.** (A) Ni 2p X-ray photoelectron spectroscopy (XPS) of various samples: (a) Ni, (b) NiCu, (c) NiCo, (d) NiZr and (e) NiMn.

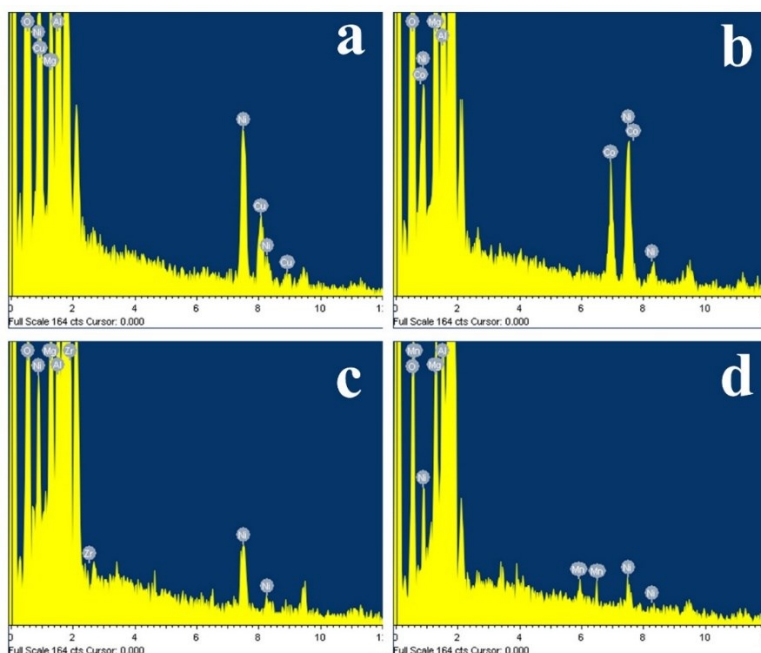

**Figure S24.** Energy Dispersive Spectroscopy (EDS) of various samples: (a) NiCu, (b) NiCo, (c) NiZr and (d) NiMn.

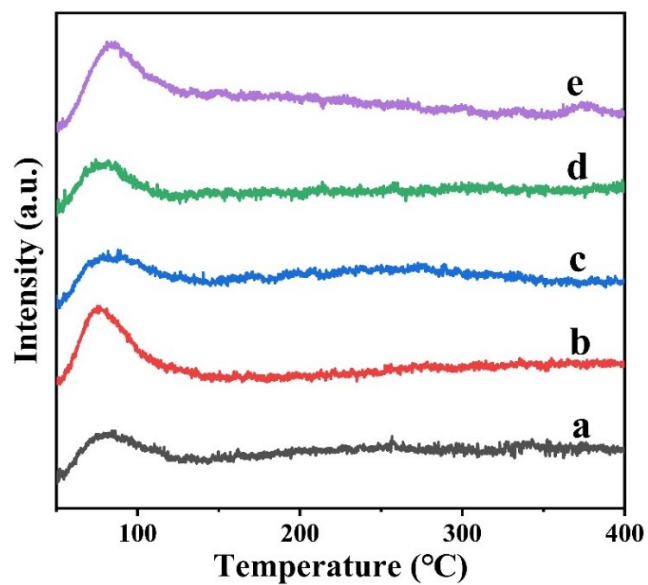

**Figure S25.** H<sub>2</sub>-TPD profiles of (a) Ni, (b) NiCu, (c) NiCo, (d) NiZr and (e) NiMn., respectively.

## REFERENCES

- [1] I. K. Suh, H. Ohta, Y. Waseda, *J. Mater. Sci.* 1988, **23**, 757.
- [2] S. D. Miller, J. R. Kitchin, *Surf. Sci.* 2009, **603**, 794.
- [3] E. Clementi, D. L. Raimondi, *J. Chem. Phys.* 1963, **38**, 2686–2689.
- [4] E. Clementi, D. L. Raimondi, W. P. Reinhardt, *J. Chem. Phys.* 1967, **47**, 1300–1307.
